# Supplementary material for: How the Rigid and Deformable Image Registration Approaches Affect the Absorbed Dose Estimation Using Images Collected before and after Transarterial Radioembolization with 90Y Resin Microspheres in a Clinical Setting
Source: MDPI journal article supplement (doi:10.3390/app122412767), 2022-12-12
Supplement: s1 [file s1]

**Table S1.** Bland-Altman analysis of absolute volumes V (expressed in ml) and mean absorbed doses D (expressed in Gy) of tumor (T), whole liver (L) and non-tumoral liver (NTL) according to the contouring approach, i.e., manual (m), rigid (r), or deformable (d).

| Var.1              | Var.2              | Bias      | LOA-      | LOA+     |
|--------------------|--------------------|-----------|-----------|----------|
| V <sub>T,m</sub>   | V <sub>T,r</sub>   | -0.1 ml   | -2.0 ml   | 1.8 ml   |
| V <sub>T,m</sub>   | V <sub>T,d</sub>   | -25.6 ml  | -115.3 ml | 64.2 ml  |
| V <sub>L,m</sub>   | V <sub>L,r</sub>   | 0.1 ml    | -4.1 ml   | 4.3 ml   |
| V <sub>L,m</sub>   | V <sub>L,d</sub>   | -103.4 ml | -403.4 ml | 196.5 ml |
| V <sub>NTL,m</sub> | V <sub>NTL,r</sub> | 0.1 ml    | -5.4 ml   | 5.6 ml   |
| V <sub>NTL,m</sub> | V <sub>NTL,d</sub> | -76.5 ml  | -349.1 ml | 196.1 ml |
| D <sub>T,m</sub>   | D <sub>T,r</sub>   | 31.2 Gy   | -80.6 Gy  | 143.0 Gy |
| D <sub>T,m</sub>   | D <sub>T,d</sub>   | 41.7 Gy   | -70.1 Gy  | 153.5 Gy |
| D <sub>T,r</sub>   | D <sub>T,d</sub>   | 10.5 Gy   | -37.1 Gy  | 58.1 Gy  |
| D <sub>NTL,m</sub> | D <sub>NTL,r</sub> | 1.9 Gy    | -9.1 Gy   | 12.9 Gy  |
| D <sub>NTL,m</sub> | D <sub>NTL,d</sub> | 2.3 Gy    | -8.8 Gy   | 13.5 Gy  |
| D <sub>NTL,r</sub> | D <sub>NTL,d</sub> | 0.4 Gy    | -7.4 Gy   | 8.2 Gy   |

**Table S2.** Bland-Altman analysis of relative volumes V (expressed in %) and mean absorbed doses D (expressed in %) of tumor (T), whole liver (L) and non-tumoral liver (NTL) according to the contouring approach, i.e., manual (m), rigid (r), or deformable (d).

| Var.1              | Var.2              | Bias (%) | LOA-   | LOA+   |
|--------------------|--------------------|----------|--------|--------|
| V <sub>T,m</sub>   | V <sub>T,r</sub>   | -1.0%    | -1.4%  | -0.7%  |
| V <sub>T,m</sub>   | V <sub>T,d</sub>   | -30.8%   | -3.1%  | -58.5% |
| V <sub>L,m</sub>   | V <sub>L,r</sub>   | 0.1%     | 0.1%   | 0.1%   |
| V <sub>L,m</sub>   | V <sub>L,d</sub>   | -24.6%   | -12.4% | -36.7% |
| V <sub>NTL,m</sub> | V <sub>NTL,r</sub> | 0.1%     | 0.1%   | 0.1%   |
| V <sub>NTL,m</sub> | V <sub>NTL,d</sub> | -24.2%   | -13.5% | -34.9% |
| D <sub>T,m</sub>   | D <sub>T,r</sub>   | -2.6%    | -44.4% | 39.2%  |
| D <sub>T,m</sub>   | D <sub>T,d</sub>   | 8.6%     | -49.6% | 66.8%  |
| D <sub>T,r</sub>   | D <sub>T,d</sub>   | 11.2%    | -6.0%  | 28.4%  |
| D <sub>NTL,m</sub> | D <sub>NTL,r</sub> | 34.0%    | 19.1%  | 48.8%  |
| D <sub>NTL,m</sub> | D <sub>NTL,d</sub> | 61.8%    | 44.1%  | 79.4%  |
| D <sub>NTL,r</sub> | D <sub>NTL,d</sub> | 29.3%    | 26.2%  | 32.4%  |
